# Supplementary material
Source: Elsevier journal article supplement (https://www.sciencedirect.com/science/article/pii/S0212656717308429)
Supplement: mmc1 [file S0212656717308429:mmc1.pdf]

## Questionario salud bucodental

Nombre y apellidos:

Edad:

Curso escolar:

1. ¿Tienes cepillo de dientes en casa?

Sí

No

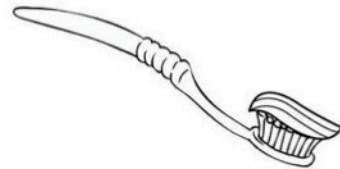

2. ¿Cuándo te cepillas los dientes?

Nunca

Algún día

Todos los días, después de:

Desayunar

Comer

Cenar

3. ¿Es importante lavarse los dientes?

Sí, todos los días.

No.

4. Señala lo que tomas en el desayuno:

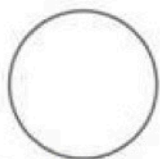

Nada

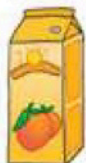

Zumos

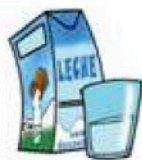

Leche

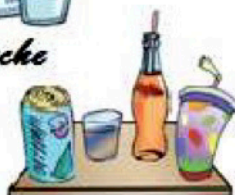

Refrescos

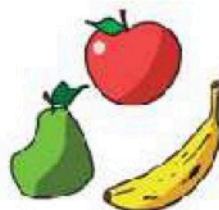

Fruta

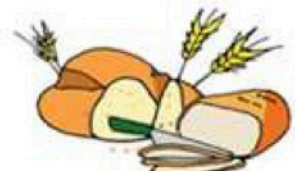

Tostadas

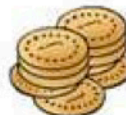

Galletas

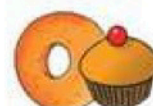

Bollería

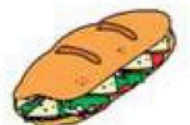

Bocadillos

5. Señala lo que tomas en el recreo y en la merienda:

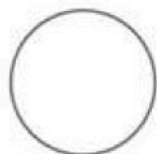

Nada

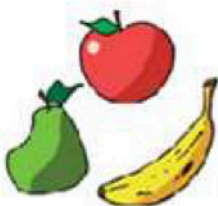

Frutas

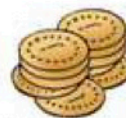

Galletas

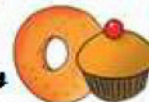

Bollería

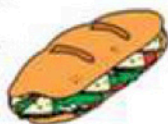

Bocadillo

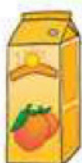

Zumos

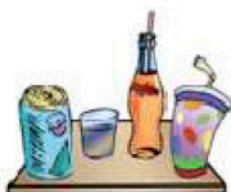

Refrescos

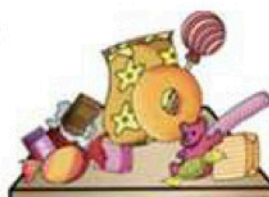

Chucherías

6. ¿Con qué frecuencia tomas...?

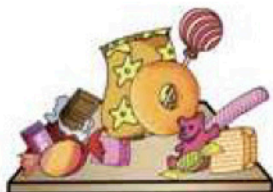

Chucherías

Ninguna  Algún día  Todos los días

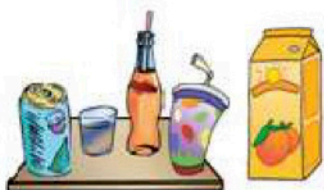

Refrescos y zumos

Ninguna  Algún día  Todos los días

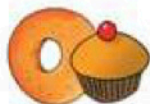

Bollería

Ninguna  Algún día  Todos los días

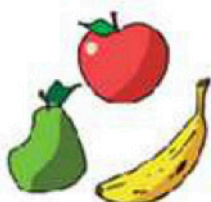

Fruta

Ninguna  Algún día  Todos los días

7. Señala qué alimentos hacen daño a los dientes.

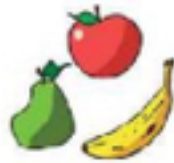

Frutas

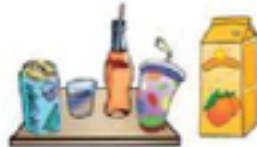

Refrescos y zumos

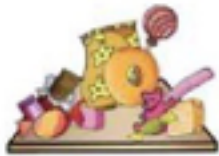

Chucherías

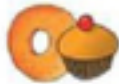

Bollería

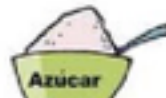

Azúcar

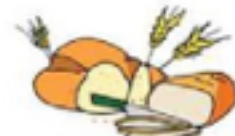

Pan
