# Supplementary material
Source: Elsevier journal article supplement (https://www.sciencedirect.com/science/article/pii/S0212656717308429)
Supplement: mmc1 [file S0212656717308429:mmc1.pdf]

## *Cuestionario salud bucodental*

*Nombre y apellidos:*

*Edad:*

*Curso escolar:*

*1. ¿Tienes cepillo de dientes en casa?*

☐ *Sí*

☐ *No*

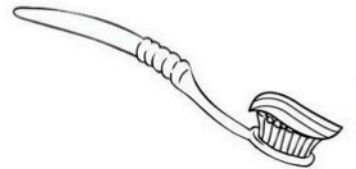

*2. ¿Cuándo te cepillas los dientes?*

☐ *Nunca*

☐ *Algún día*

*Todos los días, después de:*

☐ *Desayunar*

☐ *Comer*

☐ *Cenar*

*3. ¿Es importante lavarse los dientes?*

☐ *Sí, todos los días.*

☐ *No.*

*4. Señala lo que tomas en el desayuno:*

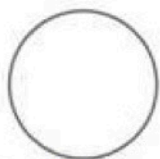

☐ *Nada*

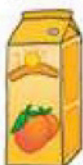

☐ *Zumos*

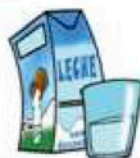

☐ *Leche*

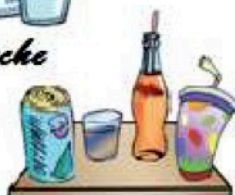

☐ *Refrescos*

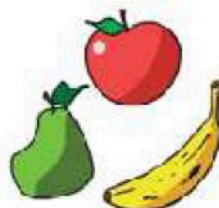

☐ *Fruta*

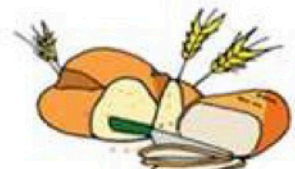

☐ *Tostadas*

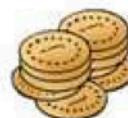

☐ *Galletas*

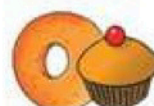

☐ *Bollería*

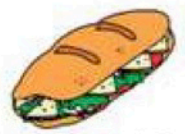

☐ *Bocadillos*

5. Señala lo que tomas en el recreo y en la merienda:

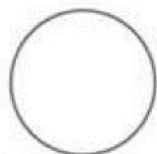

☐ Nada

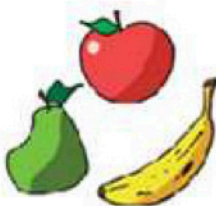

☐ Frutas

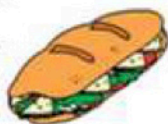

☐ Bocadillo

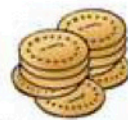

☐ Galletas

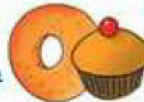

☐ Bollería

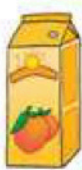

☐ Zumos

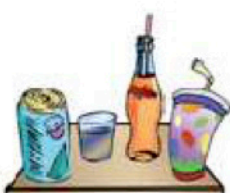

☐ Refrescos

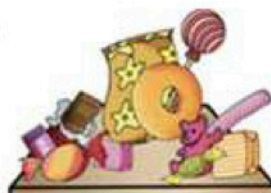

☐ Chucherías

6. ¿Con qué frecuencia tomas...?

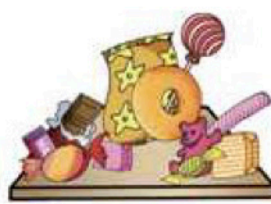

Chucherías

☐ Ninguna ☐ Algún día ☐ Todos los días

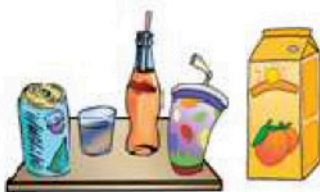

Refrescos y zumos

☐ Ninguna ☐ Algún día ☐ Todos los días

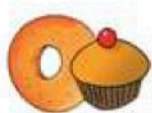

Bollería

☐ Ninguna ☐ Algún día ☐ Todos los días

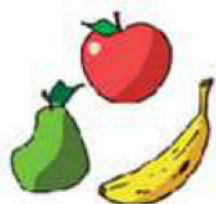

Fruta

☐ Ninguna ☐ Algún día ☐ Todos los días

7. Señala qué alimentos hacen daño a los dientes.

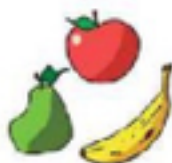

☐ Frutas

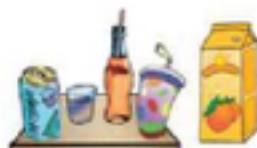

☐ Refrescos y zumos

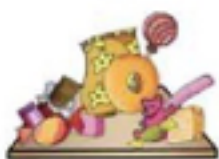

☐ Chucherías

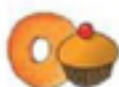

☐ Bollería

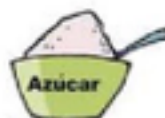

☐ Azúcar

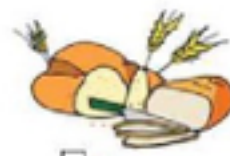

☐ Pan
